# Supplementary material for: miR-143-null Is against Diet-Induced Obesity by Promoting BAT Thermogenesis and Inhibiting WAT Adipogenesis
Source: MDPI journal article supplement (doi:10.3390/ijms232113058), 2022-10-27
Supplement: s1 [file s1]

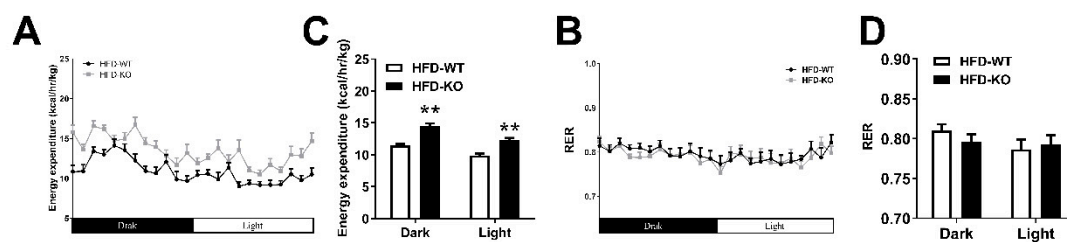

**Figure S1. The energy expenditures of WT and KO mice fed HFD for 16 weeks.** (A–D) Energy expenditure and RER of 8-week-old WT and KO mice fed HFD for 16 weeks ( $n = 4$ ). Data are presented as the mean  $\pm$  SEM. \*  $P < 0.05$  vs controls; \*\*  $P < 0.01$  vs controls, as determined by a two-tailed unpaired Student's  $t$ -test.
